# Supplementary material for: Enhancing Biomolecular Simulations with Hybrid Potentials Incorporating NMR Data
Source: PubMed Central journal article supplement (PMC9753583; doi:10.1021/acs.jctc.2c00657), 2022-11-17
Supplement: ct2c00657_si_001.pdf [file ct2c00657_si_001.pdf]

## Supporting Information

### Enhancing Biomolecular Simulations With Hybrid Potentials Incorporating NMR Data

Guowei Qi<sup>†,1</sup> Michail D. Vrettas<sup>†,2</sup> Carmen Biancaniello,<sup>2</sup> Maximo Sanz-Hernandez,<sup>3</sup>  
Conor T. Cafolla,<sup>1</sup> John W. R. Morgan,<sup>1</sup> Yifei Wang,<sup>1</sup> Alfonso De Simone\*,<sup>2</sup> and David  
J. Wales\*<sup>1</sup>

<sup>1</sup>*Department of Chemistry, University of Cambridge, Lensfield Road,  
Cambridge CB2 1EW, UK*

<sup>2</sup>*Department of Pharmacy, University of Naples Federico II, 80131 Naples,  
Italy*

<sup>3</sup>*Department of Life Sciences, Imperial College London, South Kensington,  
London SW7 2AZ, UK*

(Dated: 31 October 2022)

---

<sup>†</sup> GQ and MDV contributed equally to this work.

\* Correspondence to: [dw34@cam.ac.uk](mailto:dw34@cam.ac.uk) or [alfonso.desimone@unina.it](mailto:alfonso.desimone@unina.it)

## I. SUPPORTING INFORMATION MATERIAL

Table S1: Training dataset sizes for all six atoms.

| Target Atom      | Number of tri-peptides |
|------------------|------------------------|
| $\delta N$       | 241,501                |
| $\delta C$       | 192,416                |
| $\delta C\alpha$ | 253,929                |
| $\delta C\beta$  | 232,944                |
| $\delta H$       | 249,223                |
| $\delta H\alpha$ | 233,060                |

Table S2: T-test results between NAPSHIFT and the other methods. Any p-value larger than the 5.0E-02 shows that we cannot reject the null hypothesis that the means of the squared errors are from the same population. Any p-value smaller than the this threshold indicates that the means (RMSD) are significantly different in a statistical sense.

| NapShift   | p-values   |            |                  |                 |            |                  |
|------------|------------|------------|------------------|-----------------|------------|------------------|
|            | $\delta N$ | $\delta C$ | $\delta C\alpha$ | $\delta C\beta$ | $\delta H$ | $\delta H\alpha$ |
| CamShift   | 4.546E-141 | 1.347E-15  | 1.756E-117       | 1.332E-15       | 2.639E-69  | 2.725E-68        |
| ShiftX2    | 1.423E-08  | 1.400E-01  | 4.243E-12        | 1.428E-25       | 4.817E-12  | 5.794E-01        |
| SPARTA+    | 4.790E-32  | 1.139E-01  | 3.138E-12        | 2.160E-02       | 8.977E-30  | 1.339E-02        |
| UCBSHIFT-X | 6.204E-02  | 5.611E-01  | 3.576E-01        | 1.428E-01       | 1.484E-16  | 2.643E-07        |

Table S3: The training set includes **2987** PDB files.

|      |      |      |      |      |      |      |      |      |      |
|------|------|------|------|------|------|------|------|------|------|
| 2M9A | 2LLG | 2JUC | 2EKH | 2I9Y | 6Y8W | 2MQK | 2LZO | 2MG2 | 2K87 |
| 2MTE | 2D7M | 2LFI | 2GT3 | 2L7P | 1QA5 | 1V5M | 5IM8 | 2MZQ | 2KVC |
| 5IIR | 2LMG | 1YWS | 5L1C | 2JNP | 2BYE | 5T4R | 5SZW | 3ZUA | 2DAE |
| 2K72 | 2N24 | 2CKN | 2KSF | 2JQG | 2LUO | 2K2D | 2M7T | 2DIM | 2H3J |
| 1X5I | 2KGO | 1V86 | 2M8R | 2JN7 | 2LVG | 4A5V | 2MYF | 6C44 | 2EQR |
| 2KPN | 2DN7 | 2D89 | 2EMK | 2M6M | 2DAM | 2JQN | 2NXU | 2KLC | 1UEP |
| 6BP9 | 2EEB | 1X3H | 2LWB | 2MKH | 1UFN | 2L8D | 5LM0 | 2DK7 | 2GL1 |
| 2N7Z | 2MIX | 2MOP | 2MBG | 2LSU | 2YS1 | 2NLN | 2ECY | 6QXZ | 1X5N |
| 2LFR | 2JUO | 2KPW | 2COM | 2KVT | 2M4N | 2LRD | 2MVO | 2MW0 | 5FZV |
| 6NU4 | 2N1L | 2LT8 | 2LW7 | 2JXD | 2MIZ | 2LUU | 2MYV | 2E9G | 2K45 |
| 2LH0 | 2KHM | 2RT6 | 2MNV | 5W0Y | 2MJD | 2EMZ | 2MFR | 2MV4 | 2RSW |

*Continued on next page*

Table S3 – Continued from previous page

|      |      |      |      |      |      |      |      |      |      |
|------|------|------|------|------|------|------|------|------|------|
| 2JV4 | 2LW8 | 2LPI | 2KD7 | 2KW0 | 5ABK | 2MLH | 2RS8 | 2EEA | 2LLD |
| 2LEO | 2AKK | 1WFS | 2LSM | 2DB5 | 5ZCZ | 2L9Z | 2K8I | 2LX5 | 2CTL |
| 2EN9 | 2M6O | 2JQE | 2RS2 | 2RSO | 6F2X | 2LY0 | 2YSL | 2KCQ | 6Y07 |
| 2KVS | 5Z1Y | 2JPN | 2YZ0 | 2N4T | 2JXT | 2DI8 | 2MHJ | 6D74 | 2LAW |
| 2LW1 | 1X1M | 2JUF | 2MZ0 | 2L6B | 2LUA | 2LCC | 2LQB | 2NB2 | 1V63 |
| 2LOU | 4AR0 | 2L7Y | 2LE1 | 2CT7 | 2I2J | 2M0Y | 2YSZ | 2DLS | 2NPU |
| 2MXA | 1WGN | 5LCI | 2YUK | 2N86 | 1X5H | 1XFN | 2I3E | 2LQD | 2N49 |
| 2LBC | 2LW9 | 5T7Q | 2M74 | 2DML | 1WFN | 2KCG | 2LU6 | 2M9X | 2DHY |
| 2ECV | 2E6J | 5Z2O | 6O6I | 2LUV | 2JPK | 5ZUH | 2NAA | 2KZB | 2LRX |
| 6NNB | 2N0M | 6CUI | 2L60 | 2KSG | 2K4W | 2MPC | 5UJ5 | 2JOD | 2RS6 |
| 2MTC | 6BZK | 2KRO | 2N7D | 2MQ0 | 2CO9 | 2N2J | 2KL3 | 2N3T | 2FJ6 |
| 2LL2 | 6E5C | 2FVN | 1ZV6 | 2JY9 | 2LIX | 2LW3 | 2EOM | 6PQM | 1WJL |
| 2DI7 | 2K10 | 2JTM | 5OQS | 2MMP | 2HVZ | 2M9Y | 2RT4 | 2K49 | 1WJZ |
| 2P5J | 2K19 | 2L8Y | 6OBI | 5X3L | 1V95 | 6GW7 | 2YTM | 2MRN | 6QAY |
| 5KS6 | 2MAM | 2N9D | 4A1M | 2DLT | 2LA8 | 2JSX | 2K8X | 2L50 | 2M2I |
| 2KDB | 1X43 | 2LRQ | 2MHP | 5N9V | 2EEM | 2LOK | 2MFV | 2RMN | 2D90 |
| 2MLK | 2QMV | 1SNL | 6MI5 | 2L3B | 2KA7 | 2N1V | 2LPX | 5N6R | 1DCZ |
| 2G0U | 6C41 | 6LAG | 6H5H | 2N9V | 2LZE | 5W3G | 2KC9 | 2MC2 | 6QEU |
| 2KON | 2EMA | 2LEZ | 5K5F | 2JQO | 2LR7 | 2K5G | 2RSD | 2M70 | 2RVF |
| 2AIZ | 2MUE | 2ML2 | 2MTD | 2N7A | 2JX2 | 2MAU | 2GJF | 2KNI | 6BI6 |
| 2N9Z | 2N1I | 2K9P | 1Z7P | 2KRR | 2LRI | 2LG6 | 2FE0 | 5KTF | 2K29 |
| 2EOH | 2KCU | 6O1Q | 2LFD | 2LIP | 5JHI | 5K6P | 2KZH | 2MK6 | 2LO7 |
| 2NDN | 1X5B | 2N19 | 2KCO | 2L8T | 6POJ | 2FRW | 1X4U | 2EON | 2MQU |
| 1WIR | 2M9W | 2KL5 | 2EMI | 2JN6 | 2XV9 | 5VNT | 2K3C | 6AX5 | 2KPK |
| 5UP1 | 2HGC | 2LRG | 1X69 | 2MW4 | 2N6J | 3ZOB | 2LS7 | 2MVZ | 2YSE |
| 2DZK | 1UEM | 2MDC | 2JUA | 2DMQ | 2MJM | 2FYJ | 2LSO | 2KLQ | 1X4K |
| 2DMP | 5Z8Q | 6SLY | 2EMW | 2MK2 | 6H0I | 2RT9 | 2MJ7 | 2MVG | 2DS4 |
| 2GTJ | 2MHE | 2N6N | 6DL4 | 2LL4 | 2LMI | 2K0A | 2D7L | 1Z65 | 2COA |
| 2LRT | 2YRH | 5KI0 | 6FIP | 2N8Y | 2LTA | 1IUR | 2MZU | 5GJL | 5LGM |
| 2ITA | 2EN6 | 2K8V | 2EDZ | 2L2Q | 2EMH | 6F98 | 1DX7 | 2L5P | 1Z8R |
| 2K6O | 2RNG | 2MBD | 2JR0 | 2LO0 | 2KJ9 | 6TXT | 2MWM | 2L97 | 2EGE |
| 2LVC | 2KCX | 4BHP | 2YRZ | 2KQ5 | 2NDP | 5OMZ | 2K1M | 2KX3 | 2KW7 |
| 6GT7 | 1U89 | 2B88 | 2V6Z | 5KGQ | 2M35 | 2XK0 | 6R2X | 2DA4 | 1WXA |
| 2MUA | 2JVE | 2KOB | 2MA2 | 2K54 | 2MZJ | 2MBC | 2LAT | 6RC7 | 6FZK |
| 6FW4 | 2MQB | 2LOE | 2KYL | 2E7B | 1S04 | 2HH8 | 2YUB | 2N84 | 2MAW |
| 2MKN | 1WH9 | 2JWG | 2LLW | 2MA8 | 2NC9 | 2HFI | 2MAZ | 2GQB | 2MLG |
| 1LM0 | 6ER0 | 6S00 | 2L89 | 2EML | 2M7Q | 2K8Y | 2EOG | 6G81 | 5UKE |
| 2DKM | 2N8G | 2M1X | 2LQ1 | 2E9H | 2CTM | 2LRJ | 2LXD | 2R05 | 2M5I |
| 1BQ0 | 2LK4 | 3ZG4 | 2LC3 | 6D6X | 5TTB | 2AP7 | 2JRZ | 5N7Y | 2DIN |

Continued on next page

Table S3 – Continued from previous page

|      |      |      |      |      |      |      |      |      |      |
|------|------|------|------|------|------|------|------|------|------|
| 1Z5F | 2MWH | 2MXZ | 2LEA | 1X4S | 2MZV | 2RV9 | 2AI6 | 2DJN | 2LM9 |
| 2LUW | 1PZQ | 2DMD | 2K76 | 5XZK | 2GYT | 1WXU | 2D8T | 2MLB | 2FS1 |
| 2M0N | 1WYL | 2MQM | 2LUT | 2NPB | 2A9H | 5TGW | 1WFZ | 4A24 | 2E2F |
| 5X0S | 5UE2 | 2KUD | 1V88 | 2MF7 | 2MBF | 2KYY | 2NX6 | 6FWN | 2DAJ |
| 2K5L | 2KXV | 1WHR | 2RML | 2KIC | 1WGQ | 5XJK | 2EOK | 2KT8 | 2MVB |
| 5WOT | 1WK0 | 2LYE | 2JSN | 5SYQ | 2KHE | 2CT6 | 2RV1 | 6MY1 | 2NB8 |
| 2MPF | 2DKP | 2MYP | 2O10 | 2JWE | 1X5Y | 2KZ5 | 5OGU | 2KQR | 5W8Y |
| 6URP | 2ELJ | 2JWN | 2MQJ | 5X1X | 2KCT | 2LMD | 2LRU | 2KHK | 2MF9 |
| 2LL1 | 1X5D | 2LT1 | 2NWT | 1YXR | 2L6P | 1VEX | 2K6I | 2L28 | 2KXY |
| 1WH1 | 5GAJ | 6PQE | 2KY9 | 2EN7 | 2KKO | 2JVW | 2LHS | 3GRX | 2JNK |
| 2MKX | 2LK5 | 2FXP | 2KUF | 1V87 | 2JSP | 2N4P | 6Y06 | 5JYT | 1WYQ |
| 2JN4 | 2GO9 | 2NNZ | 1WX9 | 6ALK | 5M1U | 6MK7 | 2MWQ | 2KZ6 | 2RSM |
| 2LCV | 2L9H | 6Q2Z | 2MX1 | 2KYI | 2K2C | 2OQ3 | 2P0P | 2F65 | 2M0D |
| 2KT1 | 2NA8 | 2E9I | 2KJQ | 6GC3 | 5LGF | 1BKU | 2KE7 | 2DJ4 | 1X4I |
| 6MK4 | 2L81 | 2LPV | 2L1O | 1WJP | 2M1I | 2JPD | 2YS3 | 5VO7 | 2MHY |
| 2KZV | 2M30 | 2MOG | 2FEK | 2N3L | 1YUT | 2M3N | 2YUA | 2M83 | 2M2A |
| 5K57 | 2JTY | 6YI3 | 2ECG | 2YON | 2CT1 | 2IVW | 2K32 | 2KI3 | 2M72 |
| 2JYO | 2K4Z | 2L84 | 6FI7 | 2LPK | 2CTK | 2LAK | 2MEU | 2MQE | 2K1G |
| 2YTE | 5IQ5 | 2KK7 | 2JRO | 2KT6 | 2N6R | 2MEY | 2M68 | 2LY8 | 2K7R |
| 2KK1 | 2K2F | 2KUC | 2LKB | 2KAV | 2LJX | 2LJK | 2KCW | 2N40 | 5O7J |
| 2M29 | 2MJ6 | 1X6D | 2EKJ | 2KBZ | 1V5S | 2LC1 | 5AJ1 | 2KAJ | 2MPL |
| 2KU3 | 2ZAJ | 2KNZ | 2L25 | 2MOX | 2N5M | 2LN4 | 5WOX | 6PRQ | 2MU8 |
| 2KCA | 6SY2 | 2LM2 | 2KSR | 2KSW | 2L09 | 1WY8 | 2N12 | 2M97 | 2EN2 |
| 2D9V | 2DBM | 2LCM | 2EC7 | 2MPE | 2ML3 | 2NA2 | 4CH0 | 2DZL | 6COQ |
| 5ZNU | 2KMG | 2MCA | 2MMO | 2BIC | 6RFM | 6I9H | 2KPP | 2RPS | 1WEN |
| 2LEQ | 6O8J | 1WJN | 2EOJ | 2LAH | 2RNJ | 1X05 | 6VFO | 5WUZ | 2MPQ |
| 2M0R | 2MB7 | 1WJV | 2K5C | 2N68 | 1YZC | 5AGQ | 2LLA | 2LQ6 | 2JOB |
| 2HC5 | 2MI1 | 2MG4 | 2NC2 | 2JOX | 1WK1 | 2DJB | 6BQI | 2CU7 | 2ND2 |
| 2KLU | 2MRL | 2MXW | 2YU0 | 2M6Y | 5Y0I | 2KY4 | 2HG7 | 2JR2 | 2MOF |
| 2MJU | 2MUJ | 6DMZ | 2LMA | 2L3A | 2KSD | 6MZA | 6O3S | 2LVH | 2M73 |
| 2LJB | 2MHS | 2KY5 | 2LY3 | 2JR1 | 1BCI | 2L2D | 2YTJ | 1WI8 | 2K7N |
| 2MD6 | 2K8E | 1RG6 | 2LAM | 2N65 | 6FD7 | 5KQB | 2L9P | 2LJA | 2EMP |
| 6HVK | 2LZN | 5GWW | 2N99 | 2L7K | 2DJ2 | 2K85 | 2KL2 | 2ARF | 2L04 |
| 1UJS | 2RPZ | 1VA9 | 2EP0 | 2MI5 | 2DMK | 2B1U | 2RVC | 6VTI | 2LX4 |
| 6UZJ | 2M2K | 5T42 | 2KLZ | 2M5L | 2MEK | 2K4V | 3ZBE | 2KRX | 5MTI |
| 2CT0 | 2KB6 | 2CTJ | 2M5H | 2JRL | 2EDB | 2KKV | 1Y7X | 2K0L | 2JXY |
| 5TVZ | 6R3C | 6FBL | 5ZAZ | 1WJJ | 2D88 | 1X5Z | 5W9F | 2LV5 | 2KTL |
| 6AMW | 2EME | 2KCP | 1WH8 | 2RTS | 6F46 | 2N6B | 2LYV | 2DLM | 2JR8 |
| 2YUM | 2LLX | 5LW4 | 2JRR | 2LOB | 2MG1 | 2MDV | 6TIQ | 2MI2 | 2BL6 |

Continued on next page

Table S3 – Continued from previous page

|      |      |      |      |      |      |      |      |      |      |
|------|------|------|------|------|------|------|------|------|------|
| 2EOU | 2KN8 | 2JNU | 2N90 | 2ECM | 2MI6 | 2MJK | 2YTK | 2DA5 | 5XDI |
| 2KL6 | 2MLD | 2DMC | 2KLX | 6Y1H | 2N10 | 2NAE | 2N2A | 1UGV | 5O2Y |
| 2MOT | 6VEE | 2K9Y | 2MPK | 2LAI | 2K8Q | 2NO8 | 1O1W | 2K5F | 2K2O |
| 2YSM | 3ZPM | 2M2Q | 2M9U | 2MVF | 2JOP | 1UJU | 2MOU | 2JOE | 2MF8 |
| 2HWT | 2DMS | 6F55 | 2K57 | 2KPI | 2K4B | 2ED7 | 2DA1 | 5NR5 | 2KJ8 |
| 2JN0 | 2MA4 | 2EDY | 2MHK | 2LSS | 1TUJ | 2JS7 | 1WJI | 6AX2 | 2L3T |
| 2N34 | 2N3F | 2JWS | 2RT3 | 6O0C | 6QKF | 4AXP | 1BA9 | 2RV8 | 2LXH |
| 1XPA | 5O2Q | 2K75 | 2KKY | 4BIT | 2GZP | 2OT2 | 2RUF | 2LZ5 | 1WJT |
| 5JPW | 2KR1 | 2MDG | 6MPO | 2LUL | 2KX0 | 2NB9 | 1WHN | 2LJ8 | 2LM1 |
| 2MO1 | 2N6E | 2MD1 | 2M1J | 5JI4 | 2F1E | 6MBM | 2KF2 | 2MH9 | 2D9U |
| 2KYR | 2MYI | 1WYN | 2CO8 | 1WH3 | 2DZJ | 2KCZ | 2K8A | 2JVD | 2AVG |
| 6RQS | 2L1T | 1LR1 | 6DO6 | 2L4D | 2OSR | 2RM4 | 1V9W | 2KHV | 2RPB |
| 2NBP | 2N2C | 5U6L | 2L7F | 2LZ0 | 2MUI | 2G7J | 2FI2 | 2M5Y | 2L6N |
| 5UJH | 6U3R | 2G0Q | 1ZKH | 2N5G | 5LXL | 2NCS | 2JYA | 2N1S | 1X44 |
| 2MI7 | 2JR5 | 5NMY | 2MNY | 2JNY | 2AQE | 2MXX | 2L7E | 2LNT | 2L9G |
| 5WQZ | 2RUY | 5MOU | 2JWH | 5KVP | 2LF2 | 2N03 | 5AHT | 2LWX | 2JNG |
| 2L4V | 2MF3 | 2N21 | 6CKQ | 1WI0 | 2LXI | 2MLO | 2EOF | 2DL3 | 2KZX |
| 2M47 | 2DII | 2JMS | 6HQ1 | 5GO0 | 6AP5 | 2MWI | 2KHZ | 1M3G | 2YS2 |
| 2I3B | 2LW6 | 2LX0 | 1WGY | 6GSE | 2KUT | 5JOJ | 2DMU | 2LA2 | 5M1H |
| 1WYP | 2KYS | 2KX2 | 2D8S | 2G2B | 2LLI | 5M9U | 2KIV | 2I1P | 2KJG |
| 1HYI | 2LQO | 2N2T | 2MPH | 2B1W | 2YHH | 2NBM | 2EPS | 1WGS | 2ERS |
| 2M64 | 6QH2 | 2LB6 | 6EWS | 2MW8 | 5Z9C | 2LNK | 2MSY | 4D4W | 2ENA |
| 2DJR | 2EM4 | 6CKV | 2D7Q | 2JW8 | 2L76 | 5X3Z | 2M4G | 2H1Z | 2EEC |
| 2MZC | 2L4W | 2MUB | 2AYX | 2D8V | 2KQ2 | 6NAN | 2IZ4 | 2RO0 | 2LWS |
| 6V6T | 2JT1 | 2KGT | 2N6V | 1ZRR | 2DO8 | 2ECT | 2JS3 | 2YTT | 5UI6 |
| 2LXR | 2K0Y | 2JPO | 6MG9 | 1NR3 | 2L9U | 2KSV | 2I1D | 1X5L | 2M08 |
| 6CEJ | 2KVO | 2JXP | 2DMN | 2MMY | 2ML8 | 2COF | 2L2N | 2LB0 | 2MU7 |
| 2DHX | 2NBH | 2D85 | 1WJ1 | 5XBD | 2MT9 | 2KJK | 6Q6E | 2JMO | 2N9G |
| 2KN1 | 1X3C | 5IX9 | 1X3D | 2NBG | 2E5K | 6SGO | 2L92 | 2LXU | 2E7H |
| 6H0Q | 2GZO | 2IKD | 1X5J | 2YRJ | 2LCH | 2NX7 | 2L02 | 2LE4 | 2EE0 |
| 2N2Q | 2KZY | 2JS1 | 2FHM | 2MM3 | 1WFT | 2D92 | 2YUS | 2YUN | 2I9O |
| 6PRP | 6CEI | 2CUD | 2KK2 | 5ZOR | 6MIE | 2M7A | 2ML6 | 5WOY | 5XIV |
| 2KP6 | 2MV2 | 2GDT | 2AN7 | 2D9X | 2LLZ | 2N81 | 2IJY | 2MXC | 6C00 |
| 2KSH | 3NLA | 2GRI | 1U3O | 2MV6 | 2DJU | 2LR3 | 2JRA | 2MHV | 6BUC |
| 4B8T | 2JQ4 | 2KPJ | 2LDF | 1UJX | 2LTU | 2K1S | 2MN6 | 5VJ8 | 2H25 |
| 2G5M | 5UTG | 5M4T | 2DA6 | 2LDS | 1X5Q | 6BV7 | 1WZ6 | 2L9N | 2L4F |
| 2MZ8 | 2RR8 | 2DJ3 | 2M3V | 2MVJ | 6OTA | 2NDI | 2GQE | 1X5G | 2KZC |
| 2JZC | 1L7B | 2KIF | 2DJ9 | 1ZLC | 5SXY | 2MRC | 2LFU | 5W3N | 2GJ0 |
| 6HD2 | 2KCH | 2DLU | 6OHX | 2DK4 | 6TG5 | 2KVV | 2N5L | 2FGX | 2JXX |

Continued on next page

Table S3 – Continued from previous page

|      |      |      |      |      |      |      |      |      |      |
|------|------|------|------|------|------|------|------|------|------|
| 2L7W | 2L6M | 1J19 | 2M4Y | 2MY6 | 2M3L | 1X32 | 1X6E | 2KJV | 2MJ8 |
| 2N8N | 6CAH | 2M19 | 2AJ0 | 1UH6 | 2M0S | 2M7P | 2MXO | 2KM6 | 1WJU |
| 2LBN | 5VWE | 2L57 | 2EOS | 6NK9 | 1WLN | 2JSO | 2M07 | 2DBJ | 2K4Y |
| 2N72 | 2LNE | 2LXN | 6G8O | 2LPM | 2MR9 | 2JZ8 | 6CKF | 2K9Z | 2LYC |
| 2KBV | 2N5Z | 2MXD | 2K2E | 2BZT | 2LLL | 2L7R | 2MZZ | 1WXT | 2ND4 |
| 2ECL | 2K1E | 2RS4 | 2JNT | 5AAY | 2JQ3 | 2EP2 | 2KNR | 5H7U | 2M26 |
| 2M3S | 2L0D | 3ZTG | 2KTC | 2LS4 | 1V5P | 1WFO | 2LKN | 2K5D | 2MPV |
| 2APN | 2MUP | 5TCE | 2MDR | 2D8H | 2JO7 | 2RNZ | 2LE9 | 2D9Z | 2KRU |
| 2L0W | 2DHJ | 2N7Q | 2ML1 | 2L8V | 5KES | 2NVJ | 5O1T | 2JPI | 2GRG |
| 2PLD | 2WCY | 2JMU | 5FRG | 2IKE | 2KFP | 2K31 | 2L73 | 2RU1 | 2KCK |
| 2DJS | 6QK5 | 2L43 | 2L4N | 2LWF | 2N8B | 2K2X | 2HTF | 2LVN | 2ENC |
| 2L5R | 2M6R | 2N3S | 2JXU | 6B3N | 2MYG | 2N98 | 2LJ9 | 2NBB | 2L31 |
| 2LNV | 2EM9 | 2KRF | 2LTP | 2V9H | 2EDX | 2KWL | 2M9M | 5VFW | 6BA3 |
| 2ASY | 2LWL | 2N4O | 2LPC | 2RRK | 2M3W | 2LNJ | 2D8U | 2YRP | 2HDL |
| 2M7X | 2LJS | 2LX9 | 2L2R | 2M7L | 2DMF | 1V5K | 2LCE | 2ECN | 2KKZ |
| 6UCH | 2LJM | 2LGR | 2CSY | 2NAW | 6E9M | 1X5R | 2KE4 | 2MTL | 6MK5 |
| 1UJO | 2DIZ | 5V4U | 2RUX | 2M3I | 2AYA | 2MK5 | 2KA5 | 5MGQ | 2LS8 |
| 2MKW | 2MZR | 1R79 | 6D53 | 6E4J | 2KPU | 2LT9 | 2KZA | 2LIY | 2M63 |
| 6RH5 | 2MM6 | 2JS4 | 1GEA | 6KR8 | 2FHO | 1J3T | 2L3M | 2DAW | 2LXO |
| 5WLP | 2M9H | 1QP6 | 2M1S | 2KGG | 2MM8 | 2K9I | 2JUB | 2YUP | 2L48 |
| 2M05 | 1V31 | 6NE8 | 2DT6 | 5YQ3 | 1FLS | 2JXW | 1A5J | 2LQ9 | 2LNU |
| 2E7C | 2MTI | 2LIE | 2N8F | 5LQV | 2L8O | 6XXU | 2CUF | 2KOE | 2KO1 |
| 2MC3 | 1UE9 | 1WHU | 2JM2 | 2KQ1 | 2LU7 | 2MHG | 5MXL | 2K5P | 2OV6 |
| 6AHZ | 2M0M | 2NAV | 2FRY | 2EPP | 2KN7 | 6HZ2 | 2IN2 | 2XA6 | 2M32 |
| 2KKM | 2AVX | 2DMM | 2MDZ | 2LJP | 5LBJ | 2LXB | 2H7T | 1WJS | 2KJ5 |
| 2N59 | 2LS0 | 6PPC | 5UNK | 6RPV | 5O2V | 6CJZ | 1N27 | 2L9J | 2L8A |
| 2ND7 | 2KC6 | 2M3K | 2LOS | 5OAP | 2MM9 | 5UZL | 2MNS | 2RRI | 2MN4 |
| 2N57 | 2LFJ | 5ION | 2LKQ | 2EM5 | 5VSO | 1UG7 | 1Z7T | 5XM4 | 2KVR |
| 6HNF | 2JOV | 2LC5 | 2DJ0 | 2LVL | 1X6B | 2K6N | 2GUT | 2LLY | 1WG5 |
| 6CL3 | 2LQN | 2D8J | 2MPW | 2M7O | 2LFH | 1X5W | 1WX7 | 5JWJ | 2DL8 |
| 6BQS | 1WZ4 | 2COT | 2MZS | 2LXE | 5JPX | 5ZMB | 2MLW | 2CSP | 2MU3 |
| 2B89 | 2KXI | 2MT4 | 2LV9 | 2KD2 | 1Z1Z | 1X5K | 2MRM | 2LOL | 6HH0 |
| 2N1R | 2NAQ | 2MBY | 6SOE | 5VWL | 2MPO | 2MYY | 5L82 | 6EKA | 2N5K |
| 2M85 | 2MHC | 2KRA | 1X45 | 1CL4 | 5JYH | 2KCJ | 2M9L | 2NAB | 1WF5 |
| 2M0Q | 2LGP | 2NAJ | 2I5O | 2N3D | 1X1F | 2LCU | 5LVY | 2DA0 | 2LVF |
| 5HUZ | 2KYC | 2KTS | 2LNY | 2M2U | 2FE9 | 5UP5 | 2MMM | 1VDI | 5J6W |
| 6YTS | 2L62 | 2KKC | 6I2O | 2KXD | 2DOG | 2Z4F | 2M09 | 6TOB | 2X8N |
| 2H7A | 2LC0 | 2YTG | 2LN7 | 2LRA | 2K4J | 6MJV | 2L6A | 2GOW | 2HGA |
| 2L9C | 2MH1 | 2FWU | 2K37 | 2ND9 | 6PX8 | 2LX7 | 2LHN | 2JWT | 2M0W |

Continued on next page

Table S3 – Continued from previous page

|      |      |      |      |      |      |      |      |      |      |
|------|------|------|------|------|------|------|------|------|------|
| 2BYF | 2KWT | 5FIM | 5MMU | 6RK3 | 2DM8 | 2N3J | 2KUY | 2N2Y | 2K6Z |
| 2L6R | 2MAH | 2Y4W | 2LRC | 2MSO | 2K9O | 2K5R | 5T43 | 1WH7 | 2L9L |
| 2CZN | 2KJP | 2KO8 | 2D9W | 5U9B | 6PVT | 1WIK | 6NUG | 1WGR | 2LKI |
| 2MKS | 2KD1 | 5YI4 | 1UFG | 5WDZ | 2DKQ | 2FVT | 1L6U | 1WFO | 2EOP |
| 2G1E | 2LUC | 5UOI | 2YTF | 2LOQ | 2LEP | 2N88 | 2MHD | 2M65 | 2LTJ |
| 2L33 | 2K27 | 2EOW | 2JU5 | 2MY9 | 2LOJ | 2NCA | 2LYI | 2M5V | 1WF8 |
| 2JGX | 2DJT | 2KLL | 2I7K | 1WJR | 2K7S | 2NSW | 2D7N | 2RN9 | 2KWZ |
| 2RRF | 2KLY | 2EE7 | 2RN7 | 2MTG | 2LF4 | 2N8X | 2KZ9 | 2N3P | 2YSP |
| 5J17 | 2EM1 | 2LSW | 2YOM | 2N05 | 2K9S | 6G5S | 2CXJ | 1UL7 | 2LU3 |
| 6CZT | 2N85 | 2M7B | 5N9Q | 6PX7 | 2K7B | 5WXE | 1V5Q | 1UM7 | 2I4K |
| 5FRH | 2MZY | 2L8B | 2N2F | 2LJW | 2MXN | 6V5L | 2N7F | 2BAF | 2LC6 |
| 2KXA | 1WI7 | 3ZEH | 1X3B | 2LZL | 2PNG | 2HFD | 2KAT | 6Q1X | 2O3D |
| 2KM4 | 2LUG | 2LX6 | 2KDP | 2CTD | 2N8I | 2POA | 2KZK | 1WJK | 5US5 |
| 2JR3 | 2JVF | 5ZMR | 2LPD | 2MQN | 2D7P | 2N11 | 2LGZ | 2L06 | 2K28 |
| 2ELL | 2LDU | 2M2F | 2DI9 | 1WF7 | 2LTH | 2KKR | 6QBL | 2KKE | 2MP1 |
| 2MJ4 | 2MDU | 1ZR7 | 2NDD | 2K1H | 2KFB | 2JRH | 2M6K | 2JVA | 2RUW |
| 2EQI | 2MI9 | 6BB6 | 1QFD | 2M3X | 2JPF | 2K3J | 6D6S | 5OQK | 2LRV |
| 4C7Q | 2EA6 | 2KD0 | 2LQM | 2N1N | 2KZN | 2JQQ | 2NAR | 2EHR | 2JZ4 |
| 2ECZ | 2M4V | 2G0K | 6TR8 | 2MZB | 2EE8 | 2MT7 | 2M3C | 2MX0 | 2PAC |
| 5UI7 | 2KMV | 2DMT | 2KN0 | 2MIC | 6GMS | 2NCP | 2KFL | 5MWW | 2RVA |
| 2N26 | 5UYO | 2EN0 | 2K7I | 2LTM | 1UEW | 2K6D | 6OCV | 2HJJ | 5LG9 |
| 1ILY | 2DIA | 2JX8 | 5YDX | 2LNA | 5T3Y | 2LYY | 2DAZ | 2B3A | 2LE3 |
| 2N6G | 5M0A | 6BZJ | 2ND3 | 1V5U | 5YZ9 | 1V5R | 2L47 | 2RRS | 5YXI |
| 5ZB6 | 2MOT | 6DST | 2EOX | 6GQ9 | 5MS9 | 2YSO | 2N5Q | 5OUN | 2MU9 |
| 5O6F | 2KIW | 2KG4 | 5XND | 2YUR | 2K3B | 1XHJ | 2YSQ | 2LTL | 2LIZ |
| 2GO0 | 2MC8 | 1X5X | 2ROH | 2I83 | 2M1W | 2MYX | 2KTA | 5IZB | 2DIB |
| 2DAX | 2DHI | 2J0Z | 5LO2 | 2D87 | 2MRD | 2DAH | 6NX4 | 2K24 | 2KMT |
| 2O4E | 1SXD | 2A63 | 2LQG | 2N4B | 5KK9 | 2EN4 | 2L9V | 2LIO | 6KLM |
| 2KK6 | 2M46 | 2HGK | 1K81 | 2DAL | 2K3R | 2RSX | 2LS2 | 1XQ8 | 2DIG |
| 2CUE | 2KES | 2QL0 | 6GSF | 2N17 | 2LCJ | 2L4H | 2N71 | 1WGW | 2MTX |
| 2K2A | 2MU6 | 5H2S | 2RSG | 2MZT | 2KQ8 | 2JZ6 | 2K4X | 2MO5 | 5NQ4 |
| 4UZM | 2MV3 | 2LB7 | 2LN8 | 2COD | 2M71 | 2IDA | 2C06 | 2M7N | 2MP4 |
| 5J8T | 2DJC | 2JUW | 1JSA | 2N7G | 2MMB | 2N8W | 2MQS | 2LOP | 2NPR |
| 5ODD | 2DL7 | 2L9M | 2RV5 | 2MDL | 2N30 | 1WFI | 2N6O | 6XWI | 2M45 |
| 2BTT | 2M6N | 2LPF | 1XOX | 4APD | 2KA0 | 6F8E | 2KEP | 1WES | 2K6A |
| 2DJ1 | 2JPE | 2LMB | 2LGW | 2KDD | 6FTK | 2MBT | 2LHK | 2MBX | 2EDE |
| 5GVQ | 2L5C | 5T7C | 6VED | 2L52 | 2DAV | 6UHW | 2KCL | 2LF0 | 2LGV |
| 2MOK | 2KI8 | 2LC9 | 6MZT | 2MG9 | 1WIE | 2KVA | 2JOO | 2LF6 | 1UFX |
| 6OBK | 2DLP | 6MW6 | 2MWX | 2KHQ | 6R0J | 2EMJ | 2KPA | 1TVM | 2MH4 |

Continued on next page

Table S3 – Continued from previous page

|      |      |      |      |      |      |      |      |      |      |
|------|------|------|------|------|------|------|------|------|------|
| 2YUU | 5H3N | 2RV6 | 5Y70 | 2N62 | 2DZI | 2BN8 | 2RQL | 2M5T | 2LSE |
| 2KIG | 2RS7 | 2L6K | 6BZL | 1UIV | 2N5B | 2MKJ | 2JS5 | 2N92 | 2LQ0 |
| 2DA3 | 6I3R | 2LOM | 5XQM | 2MWG | 2KC7 | 5WAH | 6F3K | 1B3I | 2NCY |
| 2N3Z | 2LFG | 2LZJ | 2MQH | 2EEL | 2JZA | 2JSW | 2A3J | 2K02 | 2DJK |
| 2MHW | 2MTW | 6GWM | 2LXL | 2YUO | 2ITH | 2LON | 2LOY | 2D86 | 2JXF |
| 2MT8 | 2M52 | 2LJ7 | 2NC8 | 2N6U | 2M80 | 2LCR | 2M6U | 2N5S | 3ZQD |
| 1WGH | 1UJV | 2JY0 | 5UHU | 2KA1 | 2MTY | 2MM5 | 2MFK | 2K6S | 2L6O |
| 2K52 | 2NBS | 2LQR | 2LA3 | 2MA1 | 2MUU | 2KYB | 4BA8 | 2DME | 2DMB |
| 2KT7 | 2I7U | 2MDQ | 2KVH | 2L95 | 2LY5 | 2JP2 | 6PIN | 2KY3 | 2KHU |
| 2E6Q | 2MXQ | 2JRT | 2RU9 | 2E7K | 2H0P | 2M01 | 2AL3 | 2M8H | 1X1G |
| 2EE2 | 2MXM | 2LW4 | 2KWC | 2N5D | 2YRM | 2KRN | 2M76 | 2L3F | 5M9Z |
| 2DAG | 2MXE | 5JTK | 2KHN | 2JNZ | 2MMG | 2DOC | 2LE2 | 6G7G | 2MNO |
| 2KPQ | 5U87 | 2MM4 | 2MDK | 2JO1 | 2LC2 | 2MRW | 2MGW | 2LLE | 2LVW |
| 2N00 | 2E9K | 2JQW | 4UZW | 2M87 | 6POR | 5O57 | 2JS0 | 2MPU | 2MKZ |
| 5YFG | 2K73 | 2K5H | 2EMF | 2JMR | 2RSC | 2FFW | 5KIZ | 2L8K | 2NCE |
| 2LD3 | 2M2L | 5T82 | 2ARW | 5AIW | 2NBA | 2LVR | 2KZW | 1JI8 | 2KPY |
| 2MYW | 2YTD | 1AXH | 2LV2 | 2L1N | 6EHZ | 5WOE | 2J48 | 2L77 | 2LJ6 |
| 2RUZ | 6NL3 | 5JS8 | 1V5O | 1UHT | 2K6V | 2DJM | 1ND9 | 2G7H | 2LS3 |
| 2MFL | 1WIN | 1WGK | 2KRK | 2KI9 | 2MRA | 2MR3 | 6O8S | 2LUS | 5XDJ |
| 2V37 | 2NDC | 2YUL | 2LBA | 5OBN | 2N31 | 5WOD | 2LSA | 6U6G | 2LS9 |
| 2MJC | 1V32 | 2JUH | 2E6P | 2KWP | 2RV0 | 5ZPV | 2MYH | 2L3N | 2KMS |
| 1J26 | 2KT0 | 2MGY | 2KQK | 2EOL | 2MOQ | 2KLB | 2K5V | 2L22 | 5MN3 |
| 2MCR | 2RUH | 4BF8 | 2KKN | 2N6D | 2GW6 | 2KJW | 2LEK | 5XME | 2CSZ |
| 2EMG | 2MGQ | 6SZC | 1BR0 | 2MLU | 5GVO | 5T17 | 5WE3 | 2MK4 | 2N9O |
| 5T6V | 2M4L | 5KZO | 2E0G | 2MJZ | 2ECC | 2N5F | 4CSQ | 1WF1 | 1WGV |
| 2KC0 | 2KQP | 2LQ5 | 1ZG2 | 2KLE | 2ED0 | 2RV7 | 2JZ2 | 2PCO | 2MDT |
| 1WF2 | 2E5E | 2N8S | 2MU4 | 6EQY | 2LLH | 2LXF | 2YS4 | 6FFQ | 1V9V |
| 2MXB | 2ED8 | 2JN3 | 6CGX | 2DBA | 4B6U | 2MFA | 6CPK | 2DHS | 2G9L |
| 2KIT | 2LCL | 2MR6 | 5Z8I | 2NDB | 2L05 | 4C26 | 2EFI | 2K0Z | 2KUM |
| 1VA8 | 2DZM | 2NDA | 6MIF | 2EE9 | 2G31 | 2L9R | 2JTV | 1X4L | 6Q5Z |
| 2KK8 | 6SJX | 2EWL | 2LXW | 2YTH | 2K1K | 6E4H | 1JJJ | 2GX1 | 2MPJ |
| 2MN3 | 6PMG | 6MM4 | 2EM2 | 2L4B | 2FY9 | 5B7J | 1WEZ | 6CJD | 2LSN |
| 2GJI | 2LKW | 2AIH | 5MSL | 2CU8 | 2LBX | 2MIQ | 2CSQ | 2LQ4 | 2D8R |
| 2H80 | 2NCH | 2VCD | 5LME | 2MSF | 6BX9 | 6CMY | 2M6J | 2LGH | 2RV2 |
| 2KN6 | 6GRV | 1V6G | 2COO | 2LZY | 2KIE | 6E26 | 2LR9 | 2MY1 | 2KUS |
| 2EXD | 5MMC | 2MJ3 | 2MDW | 2EOZ | 2I50 | 2LHJ | 2KAK | 6FE6 | 2COC |
| 2MUD | 2CKA | 2LY7 | 2KB4 | 4B2V | 2KXX | 2KMW | 2KG2 | 2EOI | 2MX7 |
| 2K5W | 2LGJ | 2KNG | 2LJU | 2E7M | 2RTT | 2LI6 | 2LO2 | 2N52 | 2K5J |
| 2N0X | 2L08 | 2KUE | 1V6E | 2GJY | 2FQA | 2LV7 | 5NBB | 1WFJ | 2E6I |

Continued on next page



Table S3 – Continued from previous page

|      |       |      |      |      |      |      |      |      |      |
|------|-------|------|------|------|------|------|------|------|------|
| 2N6F | 2LXK  | 1WH4 | 2M51 | 2JNS | 2E63 | 2LS5 | 2JQV | 2IIT | 2LEW |
| 5OAY | 6U4M  | 2DN6 | 2MTF | 2E0H | 2L9Y | 2N5U | 2L82 | 2MIU | 2AGH |
| 5NZ9 | 5LFI  | 2AJE | 2JQ8 | 2KBB | 1X6F | 5IEC | 2LEN | 2NA0 | 2NCN |
| 6BF2 | 2LAA  | 2MBS | 2LDE | 2EM3 | 2L5Q | 2M48 | 2LDY | 5KPE | 2LTR |
| 2L10 | 2DL4  | 2MVA | 6V88 | 2D8Q | 6MSP | 4A53 | 1WH5 | 5VAV | 2LE7 |
| 2JT0 | 2CSW  | 2LWQ | 2KZ4 | 2FFK | 2DF0 | 2ECI | 2OA4 | 2JMM | 2NB5 |
| 2EBM | 2EEF  | 2MX2 | 2LJ0 | 5TTT | 2E61 | 2KAE | 2DI0 | 6H0J | 5X34 |
| 5VKG | 2KOJ  | 1Z8S | 2MQL | 2RQ0 | 6CPI | 2W9U | 5ML1 | 2KZ0 | 2KZQ |
| 6IB6 | 6ALY  | 2LRH | 2DIC | 2ELK | 2EED | 2MHF | 2YRL | 2DAF | 2M1T |
| 2LT2 | 2M5F  | 1J0T | 3ZPD | 2G1D | 2MHH | 2EMC | 5U3H | 2MTS | 2K0Q |
| 2LGY | 2GPF  | 5NF8 | 1EH2 | 2EMM | 2KEN | 2V1N | 2JOY | 2L9F | 6TH8 |
| 2M9K | 2MQ8  | 2N64 | 2B7E | 2KKQ | 2NAS | 2DHK | 2KFS | 2L7B | 5Y4B |
| 2DQ5 | 2K06  | 2DL9 | 1Z2Q | 2N5J | 2LWT | 2L8S | 1WJ3 | 3ZJ2 | 2WH9 |
| 2MC4 | 2LFV  | 2D9T | 2M3D | 2N51 | 2KKL | 2M5R | 1T2Y | 2K48 | 2LQL |
| 2KDN | 2M4I  | 6GO0 | 2N93 | 2M3E | 2JO6 | 2MH8 | 5A4G | 2K0M | 2RMY |
| 2N4D | 2KVU  | 2HDM | 2LNM | 2MX8 | 5IJ4 | 2K4M | 6NOM | 2LP7 | 6QS0 |
| 2RRN | 5JPL  | 2KCR | 2KRM | 2M1L | 2M7E | 5I8N | 2MIO | 2ED1 | 1WFG |
| 2MUK | 2PXG  | 2MAB | 2GGR | 2L6U | 2LF3 | 1WFW | 2HFQ | 2M1B | 5JYU |
| 6R8D | 2M4F  | 2YS9 | 1X5A | 2LQU | 5VR5 | 2RUV | 2K50 | 2K2M | 5U9S |
| 2RU8 | 1WHA  | 2DIL | 2GZU | 2JY8 | 2DL5 | 2F09 | 2L69 | 2YS0 | 2KNX |
| 5I1X | 2NBV  | 1X4Z | 2RTX | 2M5J | 2JML | 2LKZ | 6GGZ | 6GIG | 2LFC |
| 2CT5 | 1SRZ  | 2NCG | 2M1H | 6GNZ | 2L7Z | 2MHN | 2K0D | 2EBK | 2EGA |
| 6G03 | 2DWV  | 2KJL | 2LST | 5LCS | 2LKD | 2YT2 | 6OQH | 2L5T | 2EGC |
| 5I4G | 4UZX  | 6Q44 | 2N2E | 2DEF | 2KQM | 2UVS | 2MZG | 2MEW | 2RST |
| 2JU7 | 6GBD  | 2MME | 2MCZ | 2MAO | 4CRP | 1WJO | 1WFY | 2LF8 | 2ABY |
| 2EOY | 2LRO  | 6EFE | 1WXM | 6CCJ | 5ZFO | 5UTV | 5MFY | 2BBU | 2LM3 |
| 2K5I | 6GFT  | 2GMG | 1WIL | 2CUM | 2JN8 | 2CSI | 2KIZ | 4B2S | 1X4X |
| 2DA7 | 2RSQ  | 5KJG | 1N89 | 2MQA | 5X5S | 2DVH | 2YQL | 1PD7 | 2NDH |
| 1PPX | 2HJ8  | 6GS9 | 2RQ1 | 2RVH | 5IEB | 2KZR | 2KPM | 2KV4 | 6SAI |
| 2KT3 | 2KOK  | 2K6B | 2MYJ | 2KKJ | 2HEP | 2MRJ | 2N1W | 2NCV | 2L4O |
| 1W7D | 2LQ2  | 5JZR | 1V5N | 2KAM | 2AKL | 6EWT | 2LVA | 2LCK | 2KVZ |
| 2LNZ | 1X6G  | 2CTO | 2K16 | 5AAQ | 2ECW | 2N1P | 6MF8 | 2DIY | 5Z26 |
| 2RUR | 2N9W  | 2DMX | 2LZX | 2EE3 | 6AXD | 5L3N | 1WH6 | 1X4Y | 2LA7 |
| 2KK4 | 1J0F  | 2LMR | 2K1B | 2L4U | 1WJQ | 2MKE | 2L93 | 2LVS | 2N2Z |
| 2N18 | 2LSI  | 5KQJ | 5IAZ | 4CYK | 2MMH | 2LZU | 1X5F | 2MW1 | 1UFF |
| 6O3Q | 2MZ7  | 1S8K | 2OFN | 2M4E | 2LQJ | 1Y58 | 2DLG | 2MQ1 | 2KV9 |
| 2JSZ | 2K GK | 2RPJ | 2KT9 | 2ML5 | 6CWS | 2LZ1 | 5MQX | 5LWC | 2KW8 |
| 2DKT | 2RVK  | 2KFD | 2RV3 | 2KJZ | 6CPJ | 2MS3 | 2KC5 | 2KMU | 2LFE |
| 2MD9 | 2L0C  | 2LR4 | 1X5M | 2MHL | 4B19 | 1IYM | 6BTV | 2MNI | 2KNU |

Continued on next page

Table S3 – *Continued from previous page*

|      |      |      |      |      |      |      |      |      |      |
|------|------|------|------|------|------|------|------|------|------|
| 2LLK | 2DHZ | 2MZ6 | 5TJ1 | 6QWR | 1UJT | 2KPT | 2JWY | 2MT5 | 2JQZ |
| 2G9O | 5WLX | 2RVJ | 2K43 | 5KPH | 1ZXF | 1UJY | 2DJA | 2LK2 | 2LNI |
| 2MUQ | 2JZY | 2AMN | 2I85 | 2MUF | 2JQ6 | 6GS5 | 2EN3 | 2EN8 | 2KYA |
| 1TM6 | 2LRS | 2EMB | 2MD0 | 2GZY | 2JS2 | 2K8D | 2RUO | 2E8J | 2EKI |
| 2LJI | 2N3E | 2LVB | 2LCX | 2LD1 | 2L7J | 2I2H | 1EJQ | 2YUE | 2A7Y |
| 2LQ7 | 1WWY | 2MW7 | 2MIT | 2N9U | 1VAE | 2NB6 | 2E34 | 2KPO | 2LO3 |
| 2XKS | 1NY8 | 2PP4 | 6C2U | 2EOR | 5WCV | 1WEY | 2KPH | 6NW8 | 1WV  |
| 2LCW | 2N5N | 5XN4 | 2LK1 | 2M1C | 2LHT | 2DA2 | 2M5X | 2RRD | 2LAU |
| 5VTO | 2M2E | 2LQ8 | 2M4H | 6I57 | 2KRG | 2LHU | 2LSQ | 2KEO | 2CTE |
| 2JM5 | 2KGS | 6QBI | 2JOZ | 5LXK | 2JSA | 2MA5 | 2N47 | 2N35 | 2E9J |
| 2MK3 | 2EM7 | 2MIM | 2MUN | 2M6A | 1ZJQ | 2L7N | 2DJV | 2LVJ | 5W8Z |
| 2LWU | 2N2R | 5TN0 | 2N8K | 1DGQ | 2E45 | 1WFM | 2BBX | 2NBR | 2MOC |
| 5JN6 | 2KYW | 2MUY | 2N7E | 2M9V | 2M9I | 2M1U | 2KV7 | 2M7Z | 2L1S |
| 2RU5 | 2JR7 | 2KL7 | 4AAI | 2GVS | 2LUY | 2LQ3 | 2L7Q | 5AAZ | 1WX8 |
| 2L5O | 2MXV | 2LDK | 2LCQ | 2LBO | 2OI3 | 2KRT | –    | –    | –    |

Table S4: The test set of **250** PDB files. The examples that were used for testing the performance of NapShift against the other four methods, were randomly sampled from the original dataset and were excluded from the training phase.

|      |      |      |      |      |      |      |      |      |      |
|------|------|------|------|------|------|------|------|------|------|
| 2H3K | 2LA4 | 2LWP | 2N29 | 2NAU | 5IRD | 2K4Q | 2YUQ | 2KOZ | 2N2U |
| 2LGO | 2L80 | 2EPQ | 2HJQ | 4BMF | 2JRB | 2KAY | 4AKA | 1QX9 | 2FO8 |
| 1X6H | 6NUI | 2RRE | 2LR8 | 2LGL | 2E29 | 6EZ4 | 5ID3 | 3ZJ1 | 2MS7 |
| 2MGV | 1OVQ | 2KP5 | 2LBB | 2N4F | 2AYM | 1Z66 | 2FQH | 2MKL | 2M2J |
| 2AGM | 2LVX | 2LPU | 2YRQ | 2MD8 | 2KHR | 2M7H | 1TVC | 1WF9 | 2RRL |
| 2K5E | 2H41 | 2DMZ | 2LG4 | 2KZS | 2MBL | 2JUG | 2EM6 | 2CTF | 2NPL |
| 2CT2 | 2K4N | 2N1K | 2MLJ | 2EPR | 2AMI | 2MF2 | 2IUE | 2JRS | 2JNH |
| 2MUX | 2LJH | 2LUZ | 5ZCN | 2MQD | 2KQ9 | 2K3D | 2K2J | 2DB8 | 2MT3 |
| 2EDD | 2MCF | 5XI9 | 2MGS | 2JOQ | 2LIU | 2LN3 | 2JX5 | 2MK9 | 2EMV |
| 2NCL | 2MCY | 2KOU | 2N41 | 2CSS | 5IE8 | 2EE6 | 6QBZ | 2M5W | 2LCP |
| 6F24 | 2KOY | 2EOQ | 2LNB | 2OSQ | 2I59 | 4CZ4 | 2ML7 | 6DHR | 1UWO |
| 2MU0 | 2M8U | 2MBE | 2HI6 | 2ECJ | 6TR0 | 5LKN | 2N39 | 2EOV | 2LRN |
| 2EA5 | 1I17 | 2MTM | 2LR6 | 6NVZ | 2LQT | 2LWJ | 2NAN | 2LLV | 2ENH |
| 2EMY | 6F99 | 6CGH | 5IX5 | 4CPG | 2N7P | 2LM4 | 2M8C | 2L83 | 2MP8 |
| 2LV3 | 2KL1 | 5NB9 | 6HKC | 2KR7 | 2LTO | 2KEL | 2M9G | 5T3M | 2LUQ |
| 2KDR | 2KXE | 2KKU | 2M2B | 2L5L | 2M4M | 1WYO | 2MII | 2JRP | 1WFQ |

*Continued on next page*

Table S4 – *Continued from previous page*

|      |      |      |      |      |      |      |      |      |      |
|------|------|------|------|------|------|------|------|------|------|
| 2EE1 | 2A3S | 1COK | 2KHA | 2EM8 | 2KK0 | 1X5C | 2LS1 | 2EE5 | 6N8C |
| 2LDI | 2MA6 | 1WGL | 2LKV | 2LOR | 2CH0 | 2KKS | 2LTD | 2JUZ | 2MA7 |
| 2MVT | 2LG1 | 2LN0 | 2K3I | 6HT4 | 1X3A | 2NAY | 2LGX | 2LYH | 2LKY |
| 2D7O | 2MUG | 2MN2 | 1WYR | 2KUN | 2K3G | 2K4E | 2EMX | 3ZGK | 2M4K |
| 2JZ5 | 2L01 | 2KHC | 2LME | 1HZL | 5NCE | 2KB9 | 2MQC | 2KNA | 2LD4 |
| 2LKL | 2KRS | 6O6W | 2CT4 | 2LTE | 2JQ5 | 2KJF | 1RJH | 2LYX | 6GWX |
| 2LHR | 2K9N | 2K06 | 5NR6 | 2JPU | 1X5E | 2KER | 2KGJ | 2KIJ | 2JMP |
| 1WJW | 2MMV | 5MXT | 2MMW | 6C8U | 1Y4E | 2D8I | 2L9D | 2YRY | 2KEY |
| 2JRF | 1WGG | 2KW6 | 5LAH | 2YR3 | 2N78 | 1WIM | 5TMX | 2M36 | 2KZ3 |
